# Supplementary material
Source: MDPI journal article supplement (https://www.mdpi.com/2079-8954/11/1/3)
Supplement: s1 [file s1]

Archive with 2 entries (2 files):
- Table S1 Documentation.pdf
- Table S2 Sensitivity Analysis.pdf
